# Supplementary material for: Genotyping and Molecular Diagnosis of Hepatitis A Virus in Human Clinical Samples Using Multiplex PCR-Based Next-Generation Sequencing
Source: MDPI journal article supplement (doi:10.3390/microorganisms10010100), 2022-01-04
Supplement: s1 [file s1]

## Supplementary materials

**Table S1.** Primers for whole-genome sequencing of hepatitis A virus.

| Oligo ID | Sequence (5' → 3')       | Position  |
|----------|--------------------------|-----------|
| 1F       | TTCAAGAGGGGTCTCCGA       | 1-19      |
| 84F      | AGGCTATAGGCTAAATTTCCCT   | 84-105    |
| 208F     | ACGCTTTCTGTCTCTTTCTT     | 208-228   |
| 493F     | CATTCAACGCCGAGGACT       | 493-511   |
| 732F     | TAATGAATATGTCCAGACAAGGT  | 732-754   |
| 923F     | GAACCTTTGAAAACCTCTGTTG   | 923-944   |
| 1426F    | TTTACAGATTGGAGTTGC       | 1426-1444 |
| 1528F    | TATGAAGATGCAAGGGCAAA     | 1528-1547 |
| 1818F    | TTGATTTYCAGTTTTTCC       | 1818-1836 |
| 2210F    | GGAGATGATTGAGGAGTTTT     | 2210-2230 |
| 2412F    | CTGAATTGAARCTGGAGAGT     | 2412-2432 |
| 2746F    | TTACAAAACCTGCCCTTGA      | 2746-2764 |
| 3263F    | ACTGAGGAGCATGAAATAATGAA  | 3263-3285 |
| 3591F    | TGTTGCATTGGCTAAATCC      | 3591-3609 |
| 4103F    | AATTATGGCAADAAGAAGGAT    | 4103-4123 |
| 4260F    | TGAGAACTGTTCAYTCAATGG    | 4260-4280 |
| 4394F    | TGTGAGCCAGTTGTTTGCT      | 4394-4412 |
| 4636F    | ATGCCCAATGAGATTGAATA     | 4636-4655 |
| 4846F    | GGCTAAAACAAATGATGCAATT   | 4846-4867 |
| 5007F    | CAGATGATGAYAATGATAGTGC   | 5007-5028 |
| 5674F    | GGAGATGTACCTAGAGCCTTG    | 5674-5694 |
| 5788F    | AGGTCTTCCWGAATGTGTG      | 5788-5807 |
| 6082F    | AGTCCCATTCATCATCACATTG   | 6082-6103 |
| 6678F    | ATTTTTCTGCTTTGATGCTAGT   | 6678-6700 |
| 6936F    | TGTGGTTCAATGCCTTCTG      | 6836-6854 |
| 7027F    | GTGCCTCAATTGAAGCCAGT     | 7027-7046 |
| 595R     | TGCCCTAAGCACAGAGAGGT     | 576-595   |
| 1093R    | AACCTTGAACAGCAAATGCT     | 1074-1093 |
| 1485R    | AATTCATTTCTCATCTGTGT     | 1463-1485 |
| 1680R    | GAATCTGAAGCATTAAATGGA    | 1660-1680 |
| 1998R    | ATCCAAGGAACACGAAATCT     | 1979-1998 |
| 2230R    | AAAACCTCCTGAATCATCTCC    | 2210-2230 |
| 2379R    | GGATCYTCAATTGTTGTAATAGC  | 2357-2379 |
| 2578R    | TGGCAAACCATGAGGAGGATTAG  | 2556-2578 |
| 2921R    | AATGATTGTAATTTGCAATCT    | 2901-2921 |
| 3285R    | TTCATTATTCATGCTCCTC      | 3266-3285 |
| 3354R    | CCAGCAGCCAAAGARAATCCA    | 3334-3354 |
| 3911R    | AGATAACTGAGCAGCCAAAT     | 3893-3911 |
| 4179R    | GCTTCCTCAATYGCTTTCTCTAT  | 4157-4179 |
| 4413R    | TAGCAAACAACCTGGCTCAC     | 4395-4413 |
| 4763R    | CAATKGCTTCCTTAACATAAACT  | 4741-4763 |
| 4917R    | AATGAAACATTATGTCCATCCAT  | 4895-4917 |
| 5240R    | TCACGCCATGGTAAACCCC      | 5222-5240 |
| 5390R    | CTCCTAAGGCATTCATAACCC    | 5370-5390 |
| 5583R    | TCTCTAAACTTDGGAATTGTAGGA | 5560-5583 |
| 5818R    | CAAGGCCCCACCACACATT      | 5800-5818 |
| 6364R    | GGACATAAGGAAACCCAGG      | 6346-6364 |
| 6560R    | AACTAATAGCTGGACCCCAATAC  | 6538-6560 |
| 6674R    | ATGCCAATAGCAACACCTGT     | 6655-6674 |
| 6792R    | ATAGTRTTGATAAGAGCYGTCC   | 6770-6792 |
| 7278R    | TGCATAAAAGCAAACCACT      | 7260-7278 |
| 7477R    | ATTACTGAWAARARAAATAACA   | 7454-7477 |

F: forward primer; R: reverse primer.

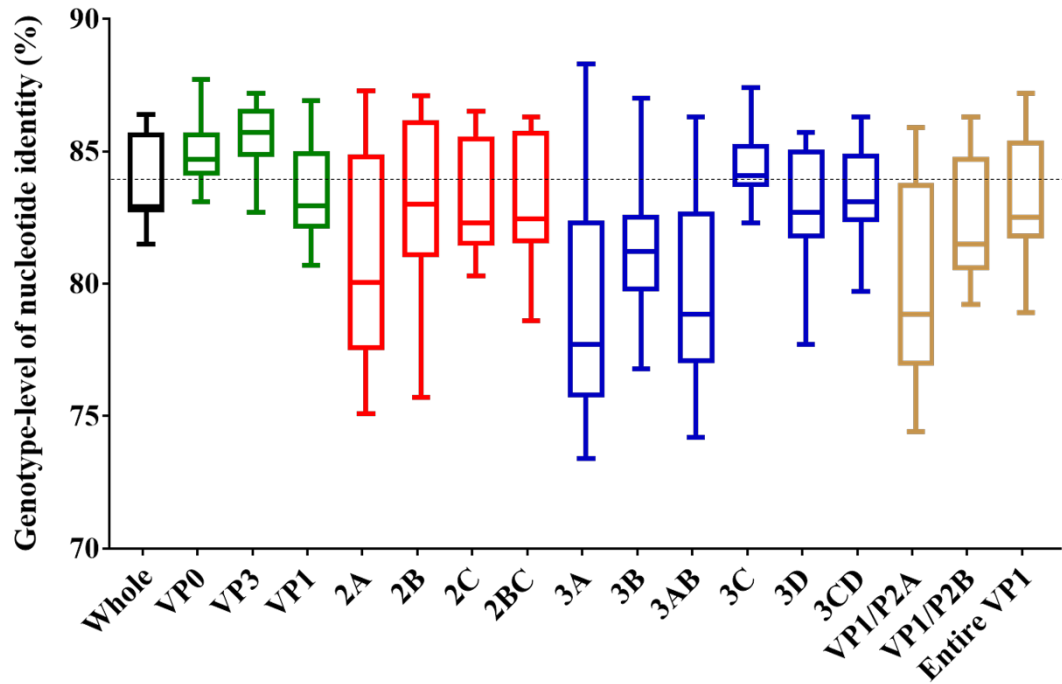

**Figure S1.** Comparison of nucleotide similarities within various hepatitis A virus (HAV) genome segments at the genotype level. The median value of nucleotide identity is shown by a dashed line. The whole-genome sequences showed 81.8–86.4% nucleotide similarities at the genotype level. The highest sequence similarities were detected in the VP0 (VP4/VP2; 83.1–87.7%), VP3 (82.7–87.2%), and 3C regions (82.3–87.4%), followed by the VP2, VP1, 2A, 2B, 2C, 2BC, 3A, 3B, 3AB, 3D, and 3CD regions (73.4–86.3%). The VP1/P2A, VP1-P2B, and entire VP1 regions exhibited 77.4–87.2% genotype similarities.

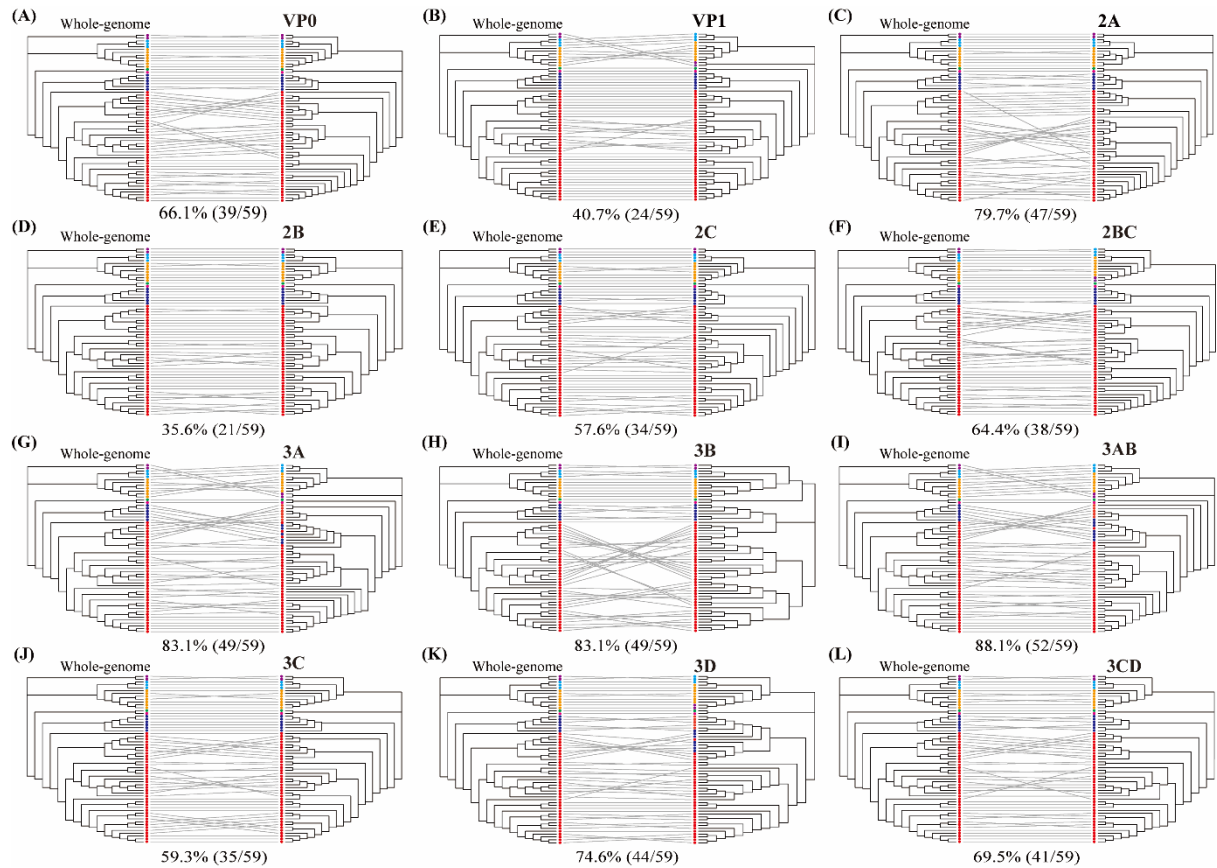

**Figure S2.** Tanglegram of hepatitis A virus (HAV) sequences based on whole- (left) and partial- (right) genome phylogenies. (A, B) VP0 (VP4/VP2) and VP1 in P1 region; (C–F) 2A, 2B, 2C, and 2BC in P2 region; (G–L) 3A, 3B,

3AB, 3C, 3D, and 3CD in P3 region. Whole-genome and partial-genome phylogenies were generated using the maximum likelihood method. The full lines indicate significant phylogenetic conflicts. Gray lines indicate phylogenetic clade patterns falling between two different regions. The phylogenetic trees of 12 partial-genome sequences showed 35.6–88.1% various phylogenetic conflicts compared with the whole-genome tree.
